# Supplementary material
Source: Research Square preprint supplement (doi:10.21203/rs.3.rs-9284759/v1)
Supplement: Supplementary file 1 [file 2dd344a26712f4b87293dd21.pdf]

1089  
1090  
1091  
1092  
1093  
1094  
1095  
1096  
1097  
1098  
1099  
1100  
1101

### Supplementary Figures

**Supplementary Table 1.** Demographics of Patients by Condition

| <b>Variable</b>               | <b>Control<br/>(n=5)<sup>1</sup></b> | <b>Long COVID<br/>(n=8)<sup>1</sup></b> | <b>p-value<sup>2</sup></b> |
|-------------------------------|--------------------------------------|-----------------------------------------|----------------------------|
| <b>Tissue Collected</b>       |                                      |                                         |                            |
| Colon & Ileum                 | 5/5 (100%)                           | 7/8 (88%)                               |                            |
| Colon Only                    | 0/5 (0%)                             | 1/8 (13%)                               |                            |
| <b>Age (years)</b>            | 48 (18)                              | 45 (12)                                 | 0.94                       |
| <b>Sex</b>                    |                                      |                                         | 0.10                       |
| Female                        | 1/5 (20%)                            | 6/8 (75%)                               |                            |
| Male                          | 4/5 (80%)                            | 2/8 (25%)                               |                            |
| <b>BMI (kg/m<sup>2</sup>)</b> | 28.2 (4.1)                           | 24.4 (5.0)                              | 0.12                       |

<sup>1</sup> n / N (%); Mean (SD)

<sup>2</sup> Wilcoxon rank sum test; Fisher's exact test; Wilcoxon rank sum exact test

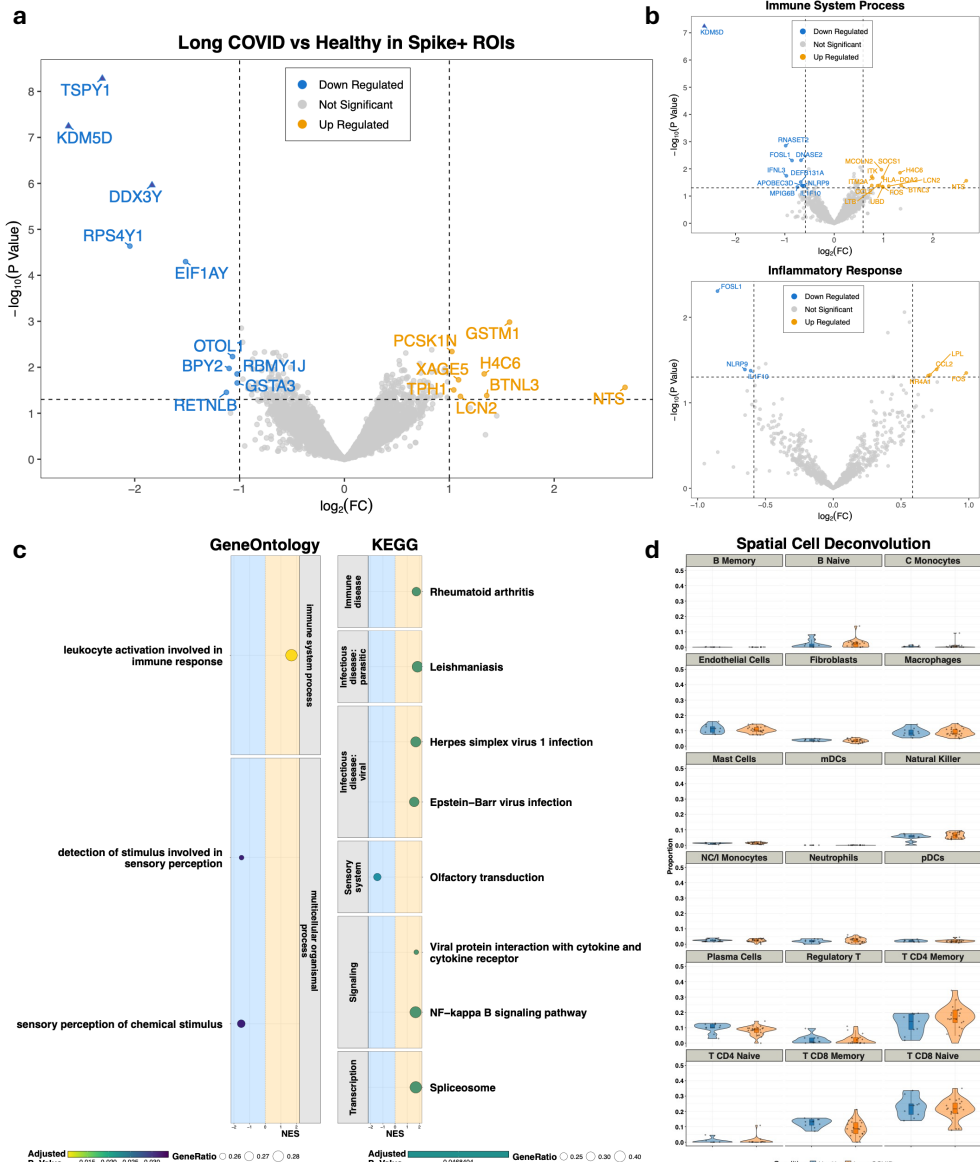

1102  
1103  
1104  
1105  
1106  
1107  
1108  
1109  
1110  
1111  
1112  
1113  
1114

**Supplementary Figure 1. Differential Expression of Long COVID and Healthy Spike+ ROIs in the Ileum by Spatial Transcriptomics.** (A) A total of 33 ROIs were analyzed between 8 Long COVID (24 ROIs) and 3 healthy (9 ROIs) participants in the region positive for SARS-CoV-2 Spike antigen. Differential analysis was performed using the limma-voom pipeline, correcting for replicate samples and variation in the frequency of detected SARS-CoV-2 Spike by ROI. 18,581 transcript targets were plotted. The main volcano plot highlights 8 and 10 genes that are upregulated and downregulated, respectively, at an unadjusted  $p$ -value threshold of 0.05 and an absolute  $\log_2FC > 1$ . Points with a triangular shape passed the adjusted  $p$ -value threshold based on a Benjamini-Hochberg correction. (B) Genes involved in *GeneOntology* (GO) (GO:0002376 & GO:0006954) parent category were filtered and plotted into each respective volcano plot with an unadjusted  $p$ -value threshold of 0.05 and an absolute  $FC > 1.5$ . (C) Gene-Set Enrichment Analysis was performed on a ranked list of  $\log_2FC$  values, resulting in 4 *GeneOntology* gene sets (2 enriched and 2 downexpressed) and 8 *KEGG* pathways (7 enriched and 1 downexpressed) passing the adjusted  $p$ -value threshold of 0.05. Representative categories were selected, and pathways/ gene sets were plotted using the normalized enrichment score (NES) alongside the ratio of genes in the leading edge to total genes in the gene set

1115 (GeneRatio) and the adjusted p-value. (D) Spatial deconvolution was performed using a safeTME reference expression profile.  
1116 Statistical significance was assessed using the propeller framework, a moderated two-tailed Mann-Whitney U test with BH FDR  
1117 correction ( $FDR \leq 0.05$  (\*),  $FDR \leq 0.01$  (\*\*),  $FDR \leq 0.001$  (\*\*\*)). No statistical significance was found in any cell type compared.

1118  
1119  
1120  
1121  
1122  
1123  
1124  
1125  
1126  
1127  
1128  
1129  
1130  
1131  
1132  
1133  
1134  
1135  
1136  
1137  
1138  
1139  
1140  
1141  
1142  
1143  
1144  
1145  
1146  
1147  
1148  
1149

1150 **Supplementary Figure 2.**

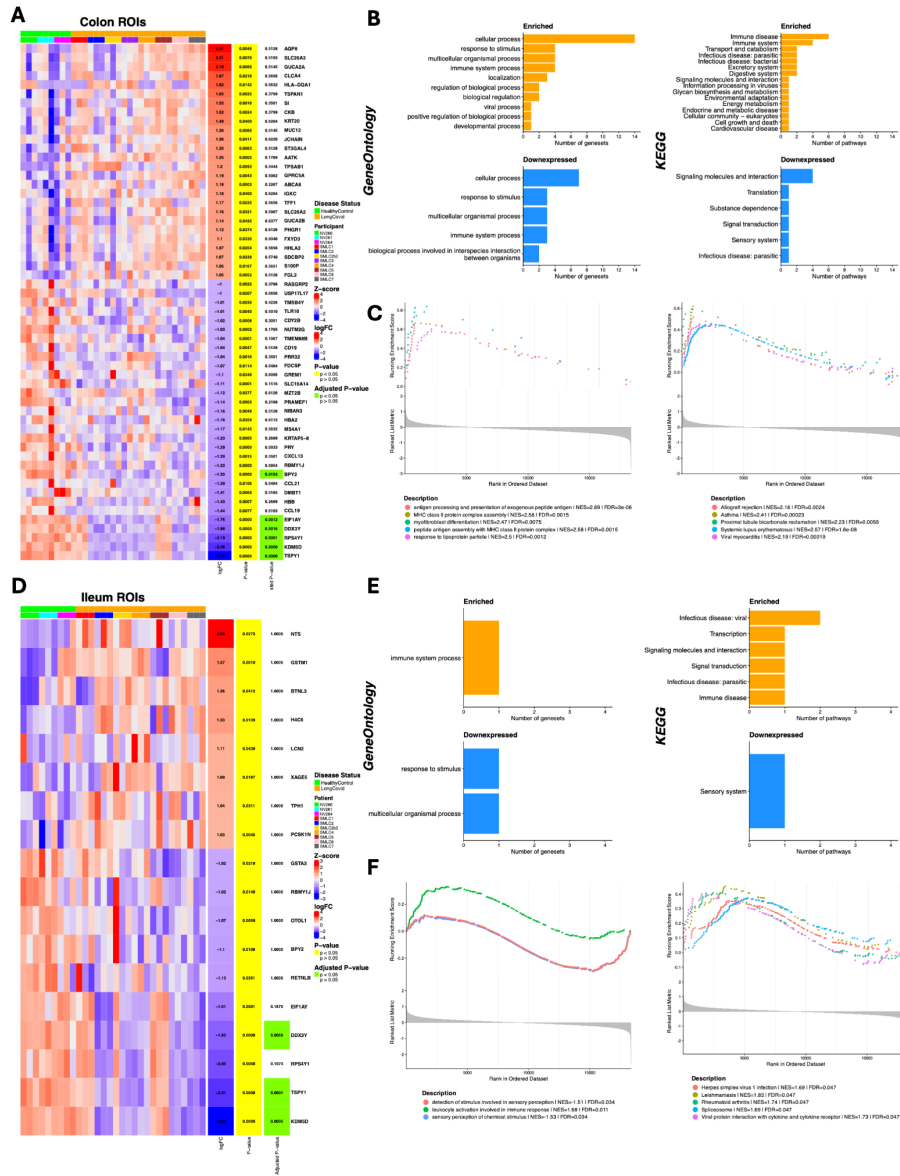

1151 **Supplementary Figure 2. GSEA enrichment hierarchy count and top leading-edge.** (A) (D) heatmap of  
 1152 differentially expressed genes (by p-value < 0.05) showing row-wise z-scored log-normalized expression scores  
 1153 organized by condition then participant. (B) (E) Count of genesets/ pathways in GeneOntology (BP) and KEGG by  
 1154 major category produced from GSEA (BH adjusted p-value < 0.05). (C) (F) The top 5 pathways by absolute NES  
 1155 were selected and plotted in a leading-edge enrichment plot with rank list metrics.

1162 **Supplementary Table 2. Patient Comorbidities and Medications.**

| Patient ID | Condition  | Comorbidities                                                                                                         | Medications                                                                                                                                                                                                                                                |
|------------|------------|-----------------------------------------------------------------------------------------------------------------------|------------------------------------------------------------------------------------------------------------------------------------------------------------------------------------------------------------------------------------------------------------|
| SMLC001    | Long COVID | allergic rhinitis; hyperlipidemia; vitamin D deficiency; colon polyps                                                 | aspirin; lactobacillus 3/FOS/pantethine; quercetin; alpha-lipoic acid; American ginseng root; bromelains; cholecalciferol; coenzyme Q; famotidine; fexofenadine; levocarnitine; montelukast; omega-3 DHA/EPA fish oil; turmeric; vitamin B complex capsule |
| SMLC002    | Long COVID | appendicitis; GERD; Hashimoto's thyroiditis; hemorrhoids; colon polyps                                                | rimegepant; nebivolol; candesartan; ondansetron; spironolactone; levothyroxine                                                                                                                                                                             |
| SMLC003    | Long COVID | dysautonomia                                                                                                          | none                                                                                                                                                                                                                                                       |
| SMLC004    | Long COVID | proctitis/periappendical inflammation                                                                                 | none                                                                                                                                                                                                                                                       |
| SMLC002B2  | Long COVID | appendicitis; GERD; Hashimoto's thyroiditis; hemorrhoids; colon polyps; mildly active nonspecific colitis (7/27/2023) | rimegepant; nebivolol; candesartan; ondansetron; spironolactone; levothyroxine                                                                                                                                                                             |
| SMLC005    | Long COVID | hemorrhoids                                                                                                           | acetylcysteine; cyanocobalamin; guanfacine; pyridoxine; pyridostigmine; valganciclovir; finasteride                                                                                                                                                        |
| SMLC006    | Long COVID | hemorrhoids; anxiety; depression                                                                                      | none                                                                                                                                                                                                                                                       |
| SMLC007    | Long COVID | PCOS; severe obesity; menorrhagia; oligomenorrhea; PTSD; ADHD; dysautonomia                                           | tizanidine; gabapentin; propranolol; cholecalciferol; alprazolam                                                                                                                                                                                           |
| NV260      | Control    | anxiety; low blood pressure; thyroid disease                                                                          | none                                                                                                                                                                                                                                                       |
| NV261      | Control    | heart failure due to valvular disease; hyperlipidemia; hypertriglyceridemia                                           | none                                                                                                                                                                                                                                                       |
| NV264      | Control    | dyslipidemia; vitamin D deficiency; peptic duodenitis                                                                 | none                                                                                                                                                                                                                                                       |
| NV362      | Control    | colon polyps                                                                                                          | famotidine; valsartan-hydrochlorothiazide                                                                                                                                                                                                                  |
| NV363      | Control    | colon polyps; breast cancer; hypertension; osteoarthritis                                                             | memantine; losartan                                                                                                                                                                                                                                        |

1163  
1164  
1165  
1166  
1167  
1168  
1169  
1170

1171

**Supplementary Table 3. Date of Last COVID-19 Infection and Vaccination History.**

| <b>Patient ID</b> | <b>Condition</b> | <b>Date of Biopsy</b> | <b>Date of Last Infection</b> | <b>Vaccination History</b>                                                                                                                                                      |
|-------------------|------------------|-----------------------|-------------------------------|---------------------------------------------------------------------------------------------------------------------------------------------------------------------------------|
| SMLC001           | Long COVID       | 11/11/22              | 4/16/22                       | COVID-19 Moderna (12Y+, 0.5 mL) – 10/23/2021, 05/28/2022<br>COVID-19 Ad26 (Janssen, Johnson & Johnson) – 4/2/2021                                                               |
| SMLC002           | Long COVID       | 11/15/22              | 2/8/21                        | Pfizer mRNA (30 mcg/0.3 mL, 12Y+) – 12/22/2021, 4/21/2021, 3/31/2021<br>Pfizer booster (30 mcg/0.3 mL, 12Y+) – 10/14/2022                                                       |
| SMLC003           | Long COVID       | 3/28/23               | ~07/22 (reported)             | No vaccine record                                                                                                                                                               |
| SMLC004           | Long COVID       | 5/23/23               | ~02/22 (reported)             | Pfizer mRNA (30 mcg/0.3 mL, 12Y+) – 03/19/2021, 02/26/2021<br>Pfizer booster (30 mcg/0.3 mL, 12Y+) – 9/23/2022                                                                  |
| SMLC002B2         | Long COVID       | 7/27/23               | 2/8/21                        | Pfizer mRNA (30 mcg/0.3 mL, 12Y+) – 12/22/2021, 4/21/2021, 3/31/2021<br>Pfizer booster (30 mcg/0.3 mL, 12Y+) – 10/14/2022                                                       |
| SMLC005           | Long COVID       | 10/23/23              | 1/7/22                        | Pfizer mRNA (30 mcg/0.3 mL, 12Y+) – 2/25/2021, 03/19/2021, 09/29/2021<br>Pfizer booster (30 mcg/0.3 mL, 12Y+) – 9/9/2022<br>COMIRNATY 2023–24 (30 mcg/0.3 mL, 12Y+) – 9/29/2023 |
| SMLC006           | Long COVID       | 10/23/23              | ~07/22 (reported)             | Janssen – 03/01/2021<br>Moderna – 11/24/2021                                                                                                                                    |
| SMLC007           | Long COVID       | 12/7/23               | 6/9/22                        | Pfizer mRNA (30 mcg/0.3 mL, 12Y+) – 12/16/2021<br>Novavax (NVX-CoV2373, 0.5 mL) – 4/25/2023                                                                                     |
| NV260             | Control          | 6/20/23               | 5/18/22                       | Pfizer mRNA (30 mcg/0.3 mL, 12Y+) – 01/27/2021, 02/17/2021, 12/18/2021                                                                                                          |
| NV261             | Control          | 6/20/23               | NA                            | Moderna mRNA (100 mcg/0.5 mL) – 1/9/2021, 2/6/2021                                                                                                                              |
| NV264             | Control          | 7/25/23               | NA                            | Pfizer mRNA (30 mcg/0.3 mL, 12Y+) – 12/8/2021                                                                                                                                   |
| NV362             | Control          | 6/26/25               | NA                            | No vaccine record                                                                                                                                                               |
| NV363             | Control          | 6/26/25               | ~03/20 (reported)             | Pfizer mRNA (30 mcg/0.3 mL, 12Y+) – 2/3/2021, 2/24/2021, 9/27/2021                                                                                                              |

1172

1173

1174

1175

1176

1177

1178

**GI Symptoms Reported vs No GI Symptoms in Long COVID Colon ROIs**

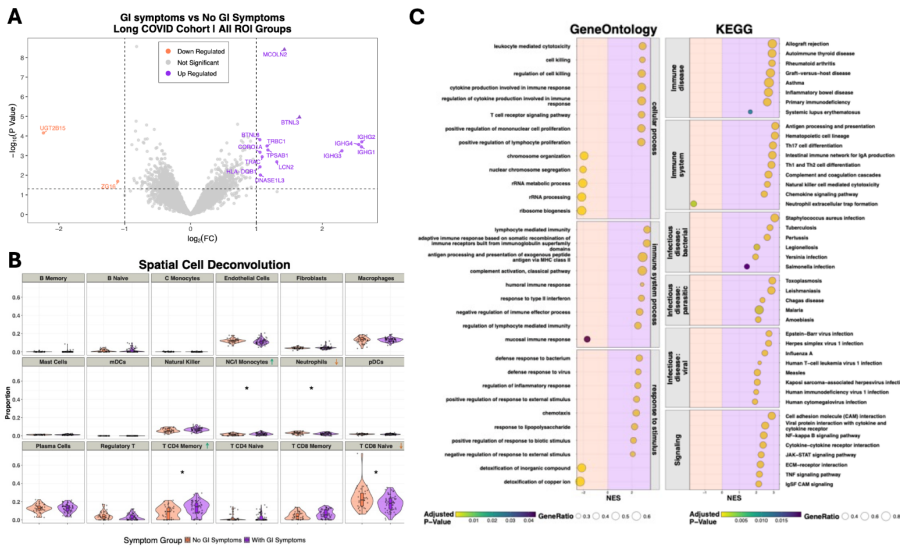

**GI Symptoms Reported vs No GI Symptoms in Long COVID Ileum ROIs**

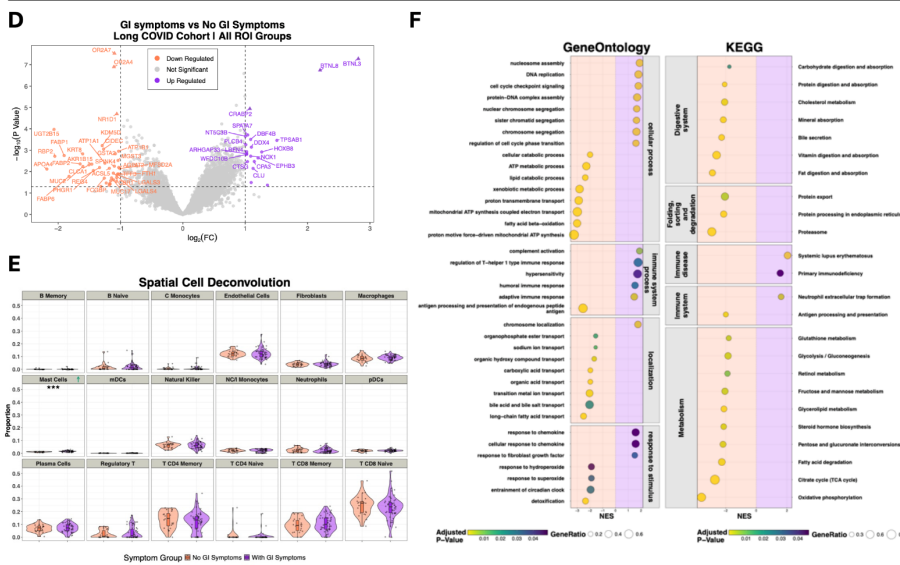

1179

1180

1181

1182

1183

1184

1185

1186

1187

1188

1189

1190

**Supplementary Figure 3. Differential Analysis of the Colon and Ileum between Long COVID Patients with and Without GI Symptoms.** (A) Differential expression of Colon ROIs for Long COVID participants with GI symptoms (5 patients) and without GI symptoms (3 patients) produced 14 upregulated and 2 downregulated statistically significant genes. (B) Spatial cell deconvolution was performed using safeTME as the reference dataset; no statistically significant (BH adjusted p-value < 0.05) comparisons were found. (C) GSEA was performed on a ranked list of  $\log_2\text{FC}$  values, resulting in 341 *GeneOntology* genesets (250 enriched and 91 downexpressed) and 119 *KEGG* pathways (86 enriched and 33 downexpressed) passing the BH-adjusted p-value threshold of 0.05. Representative categories were selected, and pathways/ gene sets were plotted using the normalized enrichment score (NES) alongside ratio of genes in the leading edge to total genes in the gene set (GeneRatio) and the adjusted p-value. (D) Differential expression of Ileum ROIs for Long COVID participants with GI symptoms (4 patients) and without GI symptoms (2 patients) produced 20 upregulated and 40 downregulated statistically significant genes. (E)

1191 Spatial cell deconvolution was performed using safeTME as the reference dataset; no statistically significant (BH  
1192 adjusted p-value < 0.05) comparisons were found. (F) GSEA was performed on a ranked list of log<sub>2</sub>FC values,  
1193 resulting in 171 *GeneOntology* genesets (55 enriched and 116 downexpressed) and 70 *KEGG* pathways (10  
1194 enriched and 60 downexpressed) passing the adjusted p-value threshold of 0.05.

1195

1196

1197

1198

1199

1200

1201

1202

1203

1204

1205

1206

1207

1208

1209

1210

1211

1212

1213

1214
